# Supplementary material for: Mouse Age Matters: How Age Affects the Murine Plasma Metabolome
Source: PubMed Central journal article supplement (PMC7699431; doi:10.3390/metabo10110472), 2020-11-19
Supplement: metabolites-10-00472-s001.pdf [file metabolites-10-00472-s001.pdf]

# Supplementary Materials for “Mouse Age Matters: How Age Affects the Murine Plasma Metabolome”

Patrick Pann <sup>1</sup>, Martin Hrabě de Angelis <sup>2,3,4</sup>, Cornelia Prehn <sup>1</sup> and Jerzy Adamski <sup>1,3,4,5,\*</sup>

<sup>1</sup> Research Unit Molecular Endocrinology and Metabolism, Helmholtz Zentrum München, German Research Center for Environmental Health (GmbH), 85764 Neuherberg, Germany; patrick.pann@helmholtz-muenchen.de (P.P.); prehn@helmholtz-muenchen.de (C.P.)

<sup>2</sup> German Mouse Clinic, Institute of Experimental Genetics, Helmholtz Zentrum München, German Research Center for Environmental Health (GmbH), 85764 Neuherberg, Germany; hrabe@helmholtz-muenchen.de

<sup>3</sup> German Center for Diabetes Research (DZD), 85764 Neuherberg, Germany

<sup>4</sup> Chair of Experimental Genetics, School of Life Science, Weihenstephan, Technische Universität München, 85354 Freising, Germany

<sup>5</sup> Department of Biochemistry, Yong Loo Lin School of Medicine, National University of Singapore, Singapore 117597, Singapore

\* Correspondence: adamski@helmholtz-muenchen.de

## Supplementary Figures

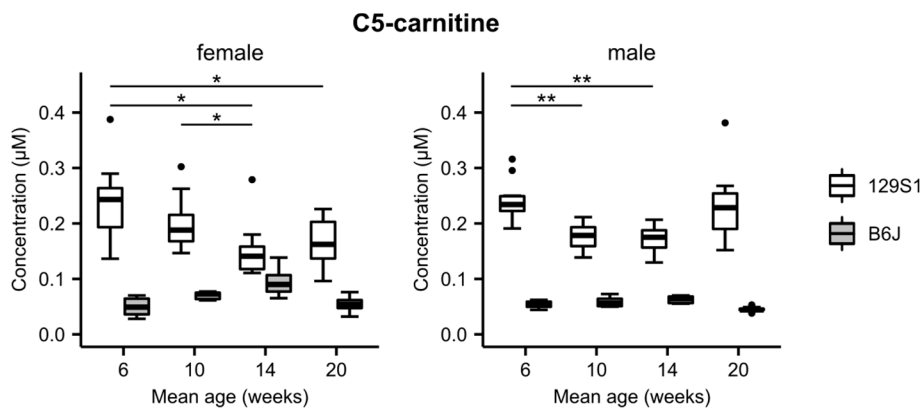

**Supplementary Figure S1.** Age-dependent changes of C5-carnitine levels in female and male mice. Changes were tested for significance using Wilcoxon rank sum tests. P-values were corrected for multiple testing using the Benjamini & Hochberg procedure and are given in brackets. \*  $p \leq 0.05$ , \*\*  $p \leq 0.01$ .

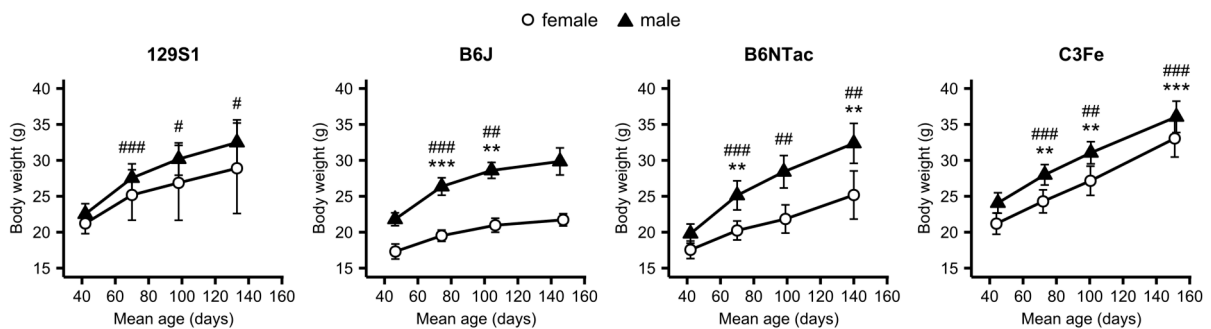

**Supplementary Figure S2.** Body weight development of different mouse strains. Animal body weight was measured at mean ages of 6, 10, 14, and 20 weeks directly before blood sampling. The exact age at sampling is given for each sex and strain as mean age in days. Data points for female and male mice are open circles and black triangles, respectively. Significance in body weight changes from 6 to 10,

10 to 14, and 14 to 20 weeks of age was calculated using Student's *t*-tests. P-values were corrected for multiple testing using the Benjamini & Hochberg procedure and are represented by \* for females and # for males. \*/#  $p \leq 0.05$ , \*\*/##  $p \leq 0.01$ . Data are expressed as mean  $\pm$  SD.

## Supplementary Tables

**Supplementary Table S1.** Selected PCA loading scores for age-dependent metabolomic changes in female mice. Metabolites with a correlation bigger than 0.85 with principle components 1, 2, or 3 for each individual mouse strain were selected. Loading scores with a correlation bigger than 0.85 are written in bold. Loading scores of metabolites selected for further analyses (see Figure 1B) are written in italics.

| Metabolite     | 129S1 |       |       | B6J   |       |       | B6NTac        |       |       | C3Fe  |       |       |
|----------------|-------|-------|-------|-------|-------|-------|---------------|-------|-------|-------|-------|-------|
|                | PC1   | PC2   | PC3   | PC1   | PC2   | PC3   | PC1           | PC2   | PC3   | PC1   | PC2   | PC3   |
| lysoPC a C20:4 | -0.69 | -0.61 | .097  | -0.12 | .018  | -.214 | <b>-0.094</b> | .102  | -.056 | -.002 | .022  | -.253 |
| PC aa C30:0    | -0.60 | .071  | -.073 | -.075 | .079  | -.012 | <b>-.138</b>  | -.009 | .029  | -.030 | .089  | -.128 |
| PC aa C32:1    | -.010 | -.060 | -.227 | -.049 | .154  | .144  | <b>-.072</b>  | -.015 | .193  | .151  | .001  | .018  |
| PC aa C34:1    | -.053 | -.119 | -.185 | -.084 | .127  | .125  | <b>-.069</b>  | .002  | .195  | .140  | .037  | -.004 |
| PC aa C34:4    | -.092 | -.090 | .003  | -.086 | .155  | .034  | <b>-.133</b>  | -.042 | .042  | .120  | -.014 | -.122 |
| PC aa C36:1    | -.045 | -.121 | -.177 | -.126 | .071  | .041  | <b>-.075</b>  | .061  | .154  | .145  | .028  | -.023 |
| PC aa C36:2    | -.043 | -.117 | -.019 | -.134 | -.034 | .054  | <b>-.084</b>  | .038  | .113  | .144  | .007  | -.058 |
| PC aa C36:3    | -.055 | -.028 | -.213 | -.120 | .018  | .125  | <b>-.079</b>  | .021  | .196  | .150  | -.005 | -.046 |
| PC aa C36:4    | -.102 | -.098 | .046  | -.114 | .086  | -.065 | <b>-.132</b>  | -.021 | -.003 | .103  | -.019 | -.189 |
| PC aa C36:5    | -.050 | -.108 | -.195 | -.077 | .158  | .089  | <b>-.077</b>  | -.024 | .183  | .142  | -.002 | -.063 |
| PC aa C38:0    | -.138 | .057  | .058  | -.132 | -.052 | -.045 | <b>-.123</b>  | -.006 | -.099 | -.012 | .090  | -.140 |
| PC aa C38:3    | -.085 | -.125 | -.130 | -.096 | .149  | -.033 | <b>-.061</b>  | .060  | .136  | .139  | .027  | -.046 |
| PC aa C38:5    | -.119 | -.043 | -.109 | -.061 | .137  | -.084 | <b>-.122</b>  | .004  | .036  | .144  | -.014 | -.095 |
| PC aa C40:4    | -.126 | -.043 | -.044 | -.121 | .101  | .011  | <b>-.116</b>  | -.031 | .045  | .150  | .035  | -.030 |
| PC aa C42:2    | -.101 | .074  | -.015 | -.134 | -.011 | .102  | <b>-.127</b>  | -.081 | .038  | .050  | .143  | .138  |
| PC aa C42:4    | -.130 | .012  | .053  | -.133 | .020  | .012  | <b>-.128</b>  | -.069 | -.027 | .003  | .150  | -.034 |
| PC aa C42:5    | -.131 | .032  | .016  | -.125 | .081  | .009  | <b>-.133</b>  | -.050 | -.036 | .071  | .131  | -.047 |
| PC aa C42:6    | -.114 | -.080 | -.069 | -.066 | .153  | .087  | <b>-.113</b>  | -.093 | .062  | .145  | -.011 | -.085 |
| PC ae C38:0    | -.138 | -.031 | -.038 | -.085 | .157  | .009  | <b>-.129</b>  | -.052 | .017  | .110  | .034  | -.097 |
| PC ae C38:2    | -.032 | .165  | .015  | -.119 | -.036 | .117  | <b>-.116</b>  | -.004 | .085  | .151  | .019  | .023  |
| PC ae C38:3    | -.093 | .127  | -.103 | -.125 | -.041 | .106  | <b>-.120</b>  | .014  | .108  | .141  | .075  | .059  |
| PC ae C38:5    | -.120 | -.050 | .024  | -.135 | .001  | -.050 | <b>-.128</b>  | .049  | -.038 | .009  | .089  | -.159 |
| PC ae C38:6    | -.120 | -.048 | .087  | -.139 | -.013 | -.037 | <b>-.109</b>  | .049  | -.096 | -.105 | .107  | -.104 |
| PC ae C40:0    | -.135 | -.034 | -.055 | -.068 | .037  | -.092 | <b>-.107</b>  | -.015 | -.030 | .131  | -.042 | -.128 |
| PC ae C40:1    | -.134 | .044  | -.018 | -.085 | .123  | -.097 | <b>-.109</b>  | .035  | -.069 | .082  | .024  | -.219 |
| PC ae C40:2    | -.128 | .015  | -.057 | -.140 | .004  | .028  | <b>-.126</b>  | -.020 | .079  | .042  | .156  | .096  |
| PC ae C40:3    | -.118 | .117  | -.056 | -.138 | -.020 | .050  | <b>-.137</b>  | .006  | .042  | .095  | .120  | .110  |
| PC ae C40:4    | -.097 | .108  | .121  | -.133 | -.040 | -.045 | <b>-.134</b>  | .003  | -.073 | .107  | .051  | -.065 |
| PC ae C40:5    | -.141 | .043  | .002  | -.133 | -.012 | -.057 | <b>-.140</b>  | .006  | -.063 | .114  | .107  | -.029 |
| PC ae C42:1    | -.133 | .044  | .026  | -.106 | .028  | -.105 | <b>-.133</b>  | -.076 | -.034 | .050  | .035  | -.134 |
| PC ae C42:2    | -.108 | .031  | -.138 | -.125 | .087  | .035  | <b>-.136</b>  | -.026 | .056  | .136  | .075  | .038  |
| PC ae C42:3    | -.133 | .020  | -.045 | -.125 | .073  | -.055 | <b>-.142</b>  | -.029 | -.007 | .131  | .060  | -.064 |
| SM C18:1       | -.119 | -.058 | .061  | -.041 | -.031 | -.217 | <b>-.047</b>  | .147  | -.103 | -.125 | .099  | -.062 |

**Supplementary Table S2.** Selected PCA loading scores for age-dependent metabolomic changes in male mice. Metabolites with a correlation bigger than 0.85 with principle components 1, 2, or 3 for each individual mouse strain were selected. Loading scores with a correlation bigger than 0.85 are written in bold. Loading scores of metabolites selected for further analyses (see Figure 1B) are written in italics.

| Metabolite     | 129S1 |       |       | B6J   |       |       | B6NTac       |       |       | C3Fe  |       |       |
|----------------|-------|-------|-------|-------|-------|-------|--------------|-------|-------|-------|-------|-------|
|                | PC1   | PC2   | PC3   | PC1   | PC2   | PC3   | PC1          | PC2   | PC3   | PC1   | PC2   | PC3   |
| C14            | -0.77 | .118  | -.045 | -.029 | -.160 | .057  | <b>-.051</b> | -.105 | .195  | -.054 | .127  | .003  |
| C16            | -.090 | .123  | -.106 | -.021 | -.172 | .003  | <b>-.042</b> | -.134 | .182  | -.085 | .125  | .062  |
| C18:1          | -.083 | .109  | -.143 | -.012 | -.174 | .017  | <b>-.043</b> | -.141 | .128  | -.059 | .076  | .152  |
| C18:2          | -.080 | .100  | -.140 | -.035 | -.166 | -.014 | <b>-.042</b> | -.148 | .155  | -.094 | .089  | .074  |
| lysoPC a C16:0 | .082  | .072  | .105  | -.098 | .001  | .094  | <b>-.129</b> | -.002 | .062  | -.028 | .148  | .031  |
| lysoPC a C20:4 | -.047 | .165  | -.022 | .010  | -.164 | .102  | <b>-.089</b> | -.145 | .029  | -.002 | .040  | .216  |
| Orn            | .070  | -.001 | .201  | -.005 | .165  | .017  | <b>-.040</b> | .113  | -.026 | .095  | .038  | -.145 |
| PC aa C32:1    | .043  | .161  | .075  | -.124 | .019  | -.164 | <b>-.046</b> | .129  | -.036 | .152  | -.017 | .000  |
| PC aa C34:1    | .032  | .141  | .026  | -.140 | .019  | -.130 | <b>-.086</b> | .068  | -.061 | .156  | .001  | -.021 |
| PC aa C34:2    | .008  | .070  | -.131 | -.139 | .043  | -.084 | <b>-.027</b> | .086  | -.149 | .149  | -.033 | -.016 |
| PC aa C36:1    | .088  | .084  | .015  | -.147 | .035  | -.087 | <b>-.116</b> | -.024 | -.110 | .159  | .002  | -.008 |
| PC aa C36:2    | .040  | .067  | -.111 | -.140 | .072  | -.095 | <b>-.076</b> | .064  | -.169 | .155  | -.039 | -.019 |
| PC aa C36:3    | .122  | .057  | -.010 | -.151 | .057  | -.046 | <b>-.099</b> | .122  | -.064 | .154  | -.050 | .003  |
| PC aa C36:4    | .015  | .139  | -.118 | -.139 | -.035 | -.103 | <b>-.124</b> | -.020 | -.069 | .149  | -.039 | .065  |
| PC aa C38:3    | .117  | .101  | .024  | -.133 | -.060 | -.046 | <b>-.116</b> | .034  | -.019 | .149  | -.010 | .048  |
| PC aa C38:5    | .007  | .197  | .005  | -.052 | -.148 | .048  | <b>-.117</b> | -.043 | .026  | .141  | -.043 | .103  |
| PC aa C40:3    | .150  | -.049 | -.029 | -.142 | .055  | -.088 | <b>-.068</b> | .180  | .058  | .143  | .036  | -.006 |
| PC aa C40:4    | .134  | -.060 | -.079 | -.151 | -.018 | -.099 | <b>-.087</b> | .147  | .080  | .155  | -.027 | .048  |
| PC aa C40:5    | -.021 | .190  | .002  | -.074 | -.149 | -.043 | <b>-.127</b> | -.005 | .017  | .117  | -.003 | .137  |
| PC aa C42:5    | .136  | -.042 | -.040 | -.138 | -.012 | -.059 | <b>-.085</b> | .143  | .097  | .147  | .004  | .050  |
| PC ae C34:1    | .105  | .087  | .005  | -.142 | .032  | -.007 | <b>-.129</b> | -.012 | .024  | .120  | .080  | .007  |
| PC ae C36:3    | .150  | -.023 | -.047 | -.149 | .061  | -.059 | <b>-.138</b> | .007  | .015  | .131  | .026  | .053  |
| PC ae C36:4    | .094  | .007  | -.104 | -.131 | -.005 | .007  | <b>-.130</b> | .001  | .076  | -.021 | .108  | .118  |
| PC ae C36:5    | .114  | -.051 | -.051 | -.084 | .095  | .067  | <b>-.133</b> | -.015 | .008  | .063  | .097  | .038  |
| PC ae C38:1    | .151  | -.020 | .047  | -.091 | .139  | .045  | <b>-.063</b> | .170  | .010  | .129  | .053  | -.116 |
| PC ae C38:2    | .137  | -.102 | -.004 | -.088 | .148  | .005  | <b>-.052</b> | .173  | -.019 | .149  | -.025 | -.071 |
| PC ae C38:3    | .159  | -.012 | .033  | -.107 | .107  | .077  | <b>-.107</b> | .119  | .015  | .146  | .056  | -.080 |
| PC ae C38:4    | .096  | .016  | -.132 | -.067 | -.081 | .095  | <b>-.129</b> | -.049 | .027  | .047  | .012  | .171  |
| PC ae C38:5    | .061  | .098  | -.113 | -.137 | -.030 | .059  | <b>-.135</b> | -.026 | .069  | .052  | .074  | .126  |
| PC ae C38:6    | .074  | .007  | -.126 | -.150 | .008  | -.022 | <b>-.110</b> | -.106 | .026  | .010  | .127  | .120  |
| PC ae C40:1    | .103  | .116  | -.045 | -.072 | -.131 | .053  | <b>-.120</b> | -.086 | -.015 | .068  | -.027 | .216  |
| PC ae C40:2    | .161  | .035  | -.030 | -.138 | .079  | .030  | <b>-.131</b> | .019  | -.006 | .066  | .145  | -.081 |
| PC ae C40:3    | .163  | -.014 | .017  | -.118 | .091  | .073  | <b>-.090</b> | .154  | .055  | .111  | .099  | -.106 |
| PC ae C40:5    | .097  | .146  | .002  | -.134 | -.023 | .122  | <b>-.135</b> | .001  | .091  | .081  | .128  | .017  |
| PC ae C42:3    | .104  | .106  | .046  | -.114 | -.058 | .082  | <b>-.133</b> | -.023 | .012  | .126  | .042  | .096  |
| Phe            | .086  | .048  | .187  | .025  | .157  | .091  | <b>-.089</b> | .040  | -.123 | .085  | .086  | -.129 |
| SM C18:1       | -.071 | .142  | -.019 | -.029 | -.137 | .039  | <b>-.057</b> | -.182 | -.018 | -.088 | .128  | .094  |
| Val            | .084  | .020  | .188  | .014  | .160  | .019  | <b>-.076</b> | .095  | -.169 | .103  | .055  | -.136 |

**Supplementary Table S3.** Selected PCA loading scores for females of age-matched mouse strains. Metabolites with a correlation bigger than 0.9 with principle components 1, 2, or 3 at each individual sampling time point were selected. Loading scores with a correlation bigger than 0.9 are written in bold. Loading scores of metabolites selected for further analyses (see Figure 4B) are written in italics. Metabolites selected for further analysis at all four sampling time points are marked with an asterisk.

| Metabolite   | 6 weeks      |              |              | 10 weeks     |              |              | 14 weeks     |              |              | 20 weeks     |              |              |
|--------------|--------------|--------------|--------------|--------------|--------------|--------------|--------------|--------------|--------------|--------------|--------------|--------------|
|              | PC1          | PC2          | PC3          | PC1          | PC2          | PC3          | PC1          | PC2          | PC3          | PC1          | PC2          | PC3          |
| Orn          | .060         | -.118        | .163         | .055         | .112         | .149         | .032         | .125         | -.036        | <i>.021</i>  | <i>.047</i>  | <b>.234</b>  |
| PC aa C32:0  | -.113        | .021         | .058         | -.108        | .005         | .045         | <b>-.124</b> | .031         | .015         | -.114        | .070         | -.001        |
| PC aa C36:4  | -.119        | .019         | .055         | -.131        | -.075        | -.032        | <b>-.124</b> | .055         | -.017        | -.119        | -.081        | .020         |
| PC aa C38:0  | <b>-.128</b> | <i>.020</i>  | <i>.043</i>  | -.133        | -.023        | .000         | -.117        | -.073        | .050         | <b>-.124</b> | .021         | -.049        |
| PC aa C40:2  | -.109        | -.093        | .082         | -.072        | <i>.144</i>  | <i>.053</i>  | <b>-.123</b> | -.034        | -.056        | <b>-.123</b> | .012         | .056         |
| PC aa C40:3  | -.116        | -.069        | .072         | -.107        | .047         | .080         | -.120        | .036         | -.042        | <b>-.121</b> | <i>-.014</i> | <i>.060</i>  |
| PC aa C40:4  | <b>-.126</b> | <i>.003</i>  | <i>-.025</i> | -.128        | -.053        | .064         | <b>-.128</b> | <i>.025</i>  | <i>-.015</i> | <b>-.124</b> | <i>-.060</i> | <i>.044</i>  |
| PC aa C40:5  | <b>-.121</b> | <i>.046</i>  | <i>-.015</i> | -.114        | -.117        | .030         | -.097        | .135         | .032         | -.106        | -.095        | .078         |
| PC aa C42:0  | <b>-.123</b> | <i>-.027</i> | <i>.071</i>  | -.113        | .082         | -.034        | -.118        | -.041        | .021         | -.120        | .026         | -.037        |
| PC aa C42:1  | <b>-.125</b> | <i>-.019</i> | <i>.070</i>  | -.091        | .091         | .030         | -.123        | -.018        | .027         | <b>-.124</b> | <i>.034</i>  | <i>-.012</i> |
| PC aa C42:2  | -.102        | -.098        | .115         | -.054        | <i>.150</i>  | <i>.079</i>  | <b>-.125</b> | -.031        | -.021        | <b>-.126</b> | .001         | .021         |
| PC aa C42:4  | <b>-.126</b> | <i>-.001</i> | <i>.067</i>  | -.136        | -.002        | .010         | <b>-.129</b> | -.031        | .023         | <b>-.127</b> | <i>-.002</i> | <i>-.017</i> |
| PC aa C42:5  | <b>-.124</b> | <i>.033</i>  | <i>.069</i>  | -.122        | -.090        | .076         | <b>-.128</b> | <i>.020</i>  | <i>.045</i>  | <b>-.129</b> | -.035        | .012         |
| PC ae C34:0  | -.120        | .013         | -.011        | -.119        | .045         | -.017        | <b>-.123</b> | -.046        | .022         | -.087        | .116         | -.084        |
| PC ae C36:1  | -.093        | -.141        | -.050        | -.053        | .161         | .082         | -.098        | -.060        | -.140        | <b>-.121</b> | .039         | .000         |
| PC ae C36:4  | <b>-.122</b> | <i>.048</i>  | <i>.017</i>  | -.131        | <i>.017</i>  | <i>-.052</i> | -.113        | -.073        | -.014        | -.113        | .073         | -.069        |
| PC ae C38:0  | -.111        | .028         | -.015        | -.116        | -.104        | .068         | -.119        | .065         | .057         | <b>-.124</b> | -.060        | -.026        |
| PC ae C38:3  | -.115        | -.104        | -.023        | -.103        | .123         | .086         | -.118        | -.007        | -.093        | <b>-.125</b> | <i>.021</i>  | <i>.042</i>  |
| PC ae C38:4* | <b>-.125</b> | <i>.043</i>  | <i>-.002</i> | -.136        | <i>-.018</i> | <i>-.089</i> | <b>-.123</b> | <i>-.074</i> | <i>.033</i>  | <b>-.121</b> | <i>.007</i>  | <i>-.048</i> |
| PC ae C38:5  | <b>-.122</b> | <i>.066</i>  | <i>-.007</i> | -.134        | <i>-.012</i> | <i>-.019</i> | <b>-.124</b> | -.024        | .005         | <b>-.127</b> | -.010        | .006         |
| PC ae C38:6  | <b>-.126</b> | <i>-.009</i> | <i>.032</i>  | -.136        | .016         | -.078        | -.122        | -.048        | .055         | -.117        | .071         | -.065        |
| PC ae C40:0  | <b>-.122</b> | <i>.046</i>  | <i>.008</i>  | -.090        | -.150        | .055         | -.118        | .072         | .064         | -.115        | -.082        | .043         |
| PC ae C40:2  | -.120        | -.091        | .022         | -.097        | .135         | .042         | <b>-.127</b> | -.012        | -.025        | <b>-.122</b> | <i>.050</i>  | <i>.048</i>  |
| PC ae C40:3  | -.117        | -.096        | .015         | -.096        | <i>.140</i>  | <i>.025</i>  | <b>-.127</b> | -.026        | -.055        | <b>-.127</b> | <i>.042</i>  | <i>.031</i>  |
| PC ae C40:4  | <b>-.127</b> | <i>-.019</i> | <i>.001</i>  | -.137        | <i>.019</i>  | <i>-.079</i> | -.121        | -.084        | -.006        | <b>-.127</b> | <i>.012</i>  | <i>-.005</i> |
| PC ae C40:5* | <b>-.129</b> | <i>.033</i>  | <i>.037</i>  | <b>-.142</b> | <i>-.054</i> | <i>.017</i>  | <b>-.127</b> | <i>.051</i>  | <i>.042</i>  | <b>-.127</b> | <i>-.025</i> | <i>.017</i>  |
| PC ae C40:6  | <b>-.127</b> | <i>.030</i>  | <i>.015</i>  | -.136        | -.032        | -.097        | -.121        | -.053        | .092         | -.119        | .022         | -.077        |
| PC ae C42:0  | <b>-.124</b> | <i>.004</i>  | <i>-.026</i> | -.101        | -.128        | .054         | -.122        | <i>.047</i>  | <i>.029</i>  | -.114        | -.097        | .036         |
| PC ae C42:2  | <b>-.121</b> | <i>.032</i>  | <i>.056</i>  | -.101        | -.076        | .157         | -.093        | .137         | .016         | -.118        | -.074        | .071         |
| PC ae C44:3  | -.108        | .020         | .125         | -.012        | -.031        | .157         | -.079        | .104         | .007         | <b>-.124</b> | <i>-.016</i> | <i>-.021</i> |
| PC ae C44:4  | -.116        | .024         | .104         | -.091        | -.035        | .135         | -.122        | <i>.058</i>  | <i>.038</i>  | <b>-.125</b> | <i>-.028</i> | <i>.029</i>  |
| PC ae C44:6  | <b>-.124</b> | <i>-.010</i> | <i>.071</i>  | -.131        | -.002        | -.034        | -.122        | .007         | .008         | -.109        | .081         | .008         |
| SM C16:1     | -.117        | -.069        | -.022        | <b>-.138</b> | <i>.031</i>  | <i>-.085</i> | -.122        | -.068        | -.004        | -.075        | .159         | -.077        |

**Supplementary Table S4.** Selected PCA loading scores for males of age-matched mouse strains. Metabolites with a correlation bigger than 0.9 with principle components 1, 2, or 3 at each individual sampling time point were selected. Loading scores with a correlation bigger than 0.9 are written in bold. Loading scores of metabolites selected for further analyses (see Figure 4B) are written in italics. Metabolites selected for further analysis at all four sampling time points are marked with an asterisk.

| Metabolite     | 6 weeks      |             |             | 10 weeks     |             |             | 14 weeks     |              |             | 20 weeks     |             |             |
|----------------|--------------|-------------|-------------|--------------|-------------|-------------|--------------|--------------|-------------|--------------|-------------|-------------|
|                | PC1          | PC2         | PC3         | PC1          | PC2         | PC3         | PC1          | PC2          | PC3         | PC1          | PC2         | PC3         |
| lysoPC a C16:1 | .076         | .156        | -.052       | .059         | -.135       | -.151       | .029         | <b>-.179</b> | -.041       | .027         | .124        | .143        |
| lysoPC a C17:0 | <b>-.121</b> | .051        | .013        | <b>-.136</b> | -.029       | -.008       | -.120        | .062         | -.001       | -.107        | -.089       | -.073       |
| lysoPC a C18:0 | -.108        | .050        | -.010       | -.114        | -.078       | -.069       | -.105        | -.060        | .089        | <b>-.121</b> | -.009       | -.011       |
| lysoPC a C18:1 | .064         | .148        | -.011       | .028         | -.142       | -.164       | -.019        | <b>-.182</b> | -.037       | -.026        | .129        | .114        |
| lysoPC a C20:3 | .090         | .097        | .014        | .030         | -.147       | -.151       | -.023        | <b>-.174</b> | -.009       | -.030        | .154        | .088        |
| PC aa C24:0    | <b>-.117</b> | .044        | -.006       | -.006        | -.016       | -.119       | -.117        | .005         | .009        | -.085        | <i>.044</i> | .132        |
| PC aa C32:2    | .050         | .156        | -.111       | .015         | -.149       | -.119       | .005         | <b>-.173</b> | -.104       | .005         | .148        | .159        |
| PC aa C34:4    | .010         | <b>.197</b> | -.095       | -.037        | -.166       | -.064       | -.002        | <b>-.182</b> | -.055       | -.057        | <i>.171</i> | -.007       |
| PC aa C36:5    | .047         | .164        | -.104       | .001         | -.163       | -.113       | -.015        | <b>-.173</b> | -.107       | -.058        | .158        | .103        |
| PC aa C38:0    | <b>-.121</b> | .027        | -.042       | <b>-.145</b> | .022        | .010        | -.124        | <i>.061</i>  | -.047       | <b>-.120</b> | -.015       | -.090       |
| PC aa C38:6    | <b>-.118</b> | .036        | -.044       | <b>-.139</b> | -.052       | .021        | -.124        | -.064        | .032        | -.108        | .087        | -.082       |
| PC aa C40:2    | <b>-.125</b> | <i>.004</i> | -.024       | -.124        | <i>.074</i> | -.024       | -.126        | <i>.067</i>  | -.045       | <b>-.119</b> | -.015       | <i>.057</i> |
| PC aa C40:3    | -.116        | .047        | -.042       | -.132        | -.018       | -.047       | <b>-.131</b> | -.023        | <i>.021</i> | -.112        | <i>.021</i> | <i>.097</i> |
| PC aa C40:4    | -.112        | .067        | -.023       | -.134        | -.071       | .009        | <b>-.129</b> | -.046        | .032        | -.115        | <i>.079</i> | <i>.004</i> |
| PC aa C40:5    | <b>-.120</b> | <i>.038</i> | <i>.014</i> | -.128        | -.088       | <i>.030</i> | -.119        | -.091        | <i>.036</i> | -.108        | <i>.097</i> | -.043       |
| PC aa C40:6    | -.092        | -.066       | -.036       | <b>-.142</b> | -.013       | <i>.052</i> | -.115        | <i>.001</i>  | <i>.108</i> | -.110        | <i>.071</i> | -.088       |
| PC aa C42:0    | <b>-.126</b> | <i>.009</i> | <i>.016</i> | -.089        | <i>.111</i> | -.017       | -.124        | <i>.041</i>  | <i>.002</i> | -.115        | -.039       | -.012       |
| PC aa C42:1    | <b>-.122</b> | <i>.002</i> | <i>.022</i> | -.094        | <i>.100</i> | -.040       | -.119        | <i>.041</i>  | -.028       | <b>-.120</b> | -.031       | -.021       |
| PC aa C42:2    | <b>-.124</b> | -.010       | -.021       | -.104        | <i>.114</i> | -.045       | -.121        | <i>.067</i>  | -.052       | <b>-.117</b> | -.022       | <i>.075</i> |
| PC aa C42:4    | <b>-.122</b> | <i>.031</i> | -.016       | <b>-.142</b> | <i>.013</i> | <i>.035</i> | <b>-.134</b> | <i>.024</i>  | <i>.000</i> | <b>-.122</b> | <i>.002</i> | -.016       |
| PC aa C42:5    | <b>-.118</b> | <i>.062</i> | -.003       | <b>-.136</b> | -.049       | <i>.017</i> | <b>-.133</b> | -.035        | <i>.027</i> | <b>-.117</b> | <i>.053</i> | <i>.010</i> |
| PC aa C42:6    | -.110        | <i>.044</i> | -.059       | <b>-.141</b> | -.022       | <i>.046</i> | <b>-.128</b> | <i>.036</i>  | <i>.032</i> | <b>-.118</b> | <i>.037</i> | -.028       |
| PC ae C32:1    | <b>-.121</b> | -.030       | <i>.007</i> | -.085        | <i>.139</i> | -.025       | -.092        | <i>.103</i>  | -.049       | -.106        | -.086       | <i>.039</i> |
| PC ae C34:3    | -.070        | -.130       | -.042       | -.014        | <b>.180</b> | -.027       | -.042        | <i>.153</i>  | -.139       | -.076        | -.146       | <i>.019</i> |
| PC ae C36:3    | -.078        | .120        | -.078       | -.079        | <i>.008</i> | -.110       | -.094        | -.020        | -.187       | <b>-.117</b> | <i>.001</i> | -.020       |
| PC ae C36:5    | <b>-.121</b> | <i>.028</i> | <i>.025</i> | -.104        | <i>.095</i> | <i>.034</i> | -.082        | <i>.091</i>  | -.146       | -.106        | -.041       | -.130       |
| PC ae C38:3    | <b>-.126</b> | <i>.024</i> | <i>.012</i> | -.105        | <i>.032</i> | -.124       | -.126        | -.011        | -.083       | <b>-.125</b> | <i>.006</i> | <i>.038</i> |
| PC ae C38:4*   | <b>-.122</b> | <i>.059</i> | <i>.019</i> | <b>-.136</b> | -.046       | <i>.072</i> | <b>-.136</b> | -.009        | -.007       | -.110        | <i>.043</i> | -.137       |
| PC ae C38:6*   | <b>-.128</b> | <i>.002</i> | <i>.003</i> | -.133        | <i>.068</i> | <i>.059</i> | <b>-.128</b> | <i>.051</i>  | -.058       | <b>-.117</b> | -.034       | -.100       |
| PC ae C40:2    | <b>-.124</b> | -.010       | <i>.001</i> | -.106        | <i>.095</i> | -.076       | <b>-.130</b> | <i>.036</i>  | -.044       | <b>-.122</b> | -.034       | <i>.048</i> |
| PC ae C40:3    | <b>-.127</b> | <i>.012</i> | -.008       | -.089        | <i>.092</i> | -.113       | <b>-.133</b> | <i>.000</i>  | <i>.002</i> | <b>-.121</b> | -.020       | <i>.048</i> |
| PC ae C40:4*   | <b>-.121</b> | <i>.058</i> | <i>.009</i> | <b>-.140</b> | -.044       | <i>.053</i> | <b>-.134</b> | <i>.004</i>  | <i>.003</i> | <b>-.118</b> | <i>.046</i> | -.085       |
| PC ae C40:5    | <b>-.124</b> | <i>.046</i> | <i>.035</i> | <b>-.138</b> | -.060       | -.007       | <b>-.134</b> | -.051        | -.009       | <b>-.120</b> | <i>.037</i> | -.074       |
| PC ae C40:6*   | <b>-.128</b> | -.004       | <i>.009</i> | <b>-.140</b> | <i>.022</i> | <i>.079</i> | <b>-.126</b> | <i>.062</i>  | <i>.000</i> | <b>-.112</b> | -.026       | -.140       |
| PC ae C44:3    | <b>-.122</b> | <i>.044</i> | <i>.016</i> | <b>-.099</b> | -.034       | -.062       | <b>-.126</b> | -.023        | -.011       | <b>-.120</b> | <i>.015</i> | <i>.011</i> |
| PC ae C44:4    | <b>-.117</b> | <i>.063</i> | -.032       | <b>-.112</b> | -.067       | -.060       | <b>-.119</b> | -.052        | -.064       | <b>-.113</b> | <i>.059</i> | <i>.047</i> |
| PC ae C44:6    | <b>-.126</b> | <i>.019</i> | <i>.003</i> | <b>-.131</b> | <i>.044</i> | -.006       | <b>-.122</b> | <i>.023</i>  | -.059       | <b>-.115</b> | -.053       | -.017       |
| SM (OH) C22:2  | <b>-.119</b> | -.042       | <i>.070</i> | <b>-.138</b> | <i>.037</i> | <i>.019</i> | <b>-.123</b> | <i>.053</i>  | <i>.011</i> | <b>-.078</b> | -.128       | -.088       |
| SM C16:1       | <b>-.116</b> | -.075       | <i>.054</i> | <b>-.137</b> | <i>.051</i> | <i>.040</i> | <b>-.124</b> | <i>.057</i>  | <i>.037</i> | <b>-.117</b> | -.058       | -.029       |

**Supplementary Table S5. Fold changes of selected metabolites showing overlap in age regulation among female mice of different strains.** Listed are fold changes in levels of plasma metabolites that were found to be age dependently regulated in three of the four analyzed mouse strains. Fold changes were calculated for the time periods 6 to 10, 10 to 14, and 14 to 20 weeks of age. Changes were tested for significance using Wilcoxon rank sum tests. P-values were corrected for multiple testing using the Benjamini & Hochberg procedure and are given in brackets. \*  $p \leq 0.05$ , \*\*  $p \leq 0.01$ , \*\*\*  $p \leq 0.001$ , n.s. not significant.

|       | Age<br>[weeks] | lysoPC a<br>C17:0 | lysoPC a<br>C18:0 | PC aa<br>C42:2 | PC aa<br>C42:5 | PC ae<br>C40:2 | PC ae<br>C40:5 | PC ae<br>C42:3 | PC ae<br>C44:3 |
|-------|----------------|-------------------|-------------------|----------------|----------------|----------------|----------------|----------------|----------------|
| 129S1 | 6 vs 10        | 1.10 (n.s.)       | 1.02 (n.s.)       | 1.01 (n.s.)    | 0.96 (n.s.)    | 1.02 (n.s.)    | 1.08 (n.s.)    | 0.87 (n.s.)    | 0.97 (n.s.)    |
|       | 10 vs 14       | 1.31 (*)          | 1.12 (n.s.)       | 1.20 (**)      | 1.25 (**)      | 1.10 (n.s.)    | 1.11 (*)       | 1.40 (**)      | 1.25 (*)       |
|       | 14 vs 20       | 0.91 (n.s.)       | 0.89 (n.s.)       | 0.93 (n.s.)    | 0.89 (n.s.)    | 0.91 (n.s.)    | 1.05 (n.s.)    | 1.06 (n.s.)    | 1.52 (*)       |
| B6J   | 6 vs 10        | 0.97 (n.s.)       | 0.85 (n.s.)       | 1.09 (n.s.)    | 0.95 (n.s.)    | 1.07 (n.s.)    | 1.04 (n.s.)    | 0.85 (n.s.)    | 1.28 (*)       |
|       | 10 vs 14       | 1.46 (***)        | 1.24 (*)          | 1.21 (n.s.)    | 1.08 (n.s.)    | 0.99 (n.s.)    | 0.96 (n.s.)    | 1.07 (n.s.)    | 0.91 (n.s.)    |
|       | 14 vs 20       | 0.60 (***)        | 0.68 (**)         | 0.60 (*)       | 0.75 (*)       | 0.74 (**)      | 0.85 (**)      | 0.89 (n.s.)    | 0.79 (*)       |
| B6N1a | 6 vs 10        | 1.27 (*)          | 1.14 (n.s.)       | 1.05 (n.s.)    | 1.22 (*)       | 1.02 (n.s.)    | 1.21 (*)       | 1.32 (**)      | 1.18 (n.s.)    |
|       | 10 vs 14       | 0.85 (n.s.)       | 0.83 (n.s.)       | 0.95 (n.s.)    | 0.75 (*)       | 1.00 (n.s.)    | 0.93 (n.s.)    | 0.92 (n.s.)    | 1.15 (n.s.)    |
|       | 14 vs 20       | 1.44 (*)          | 1.32 (*)          | 0.56 (***)     | 0.71 (n.s.)    | 0.79 (*)       | 0.72 (*)       | 0.68 (*)       | 0.37 (***)     |
| C3Fe  | 6 vs 10        | 0.84 (**)         | 0.94 (n.s.)       | 0.59 (**)      | 0.88 (n.s.)    | 0.74 (**)      | 0.96 (n.s.)    | 0.97 (n.s.)    | 0.62 (**)      |
|       | 10 vs 14       | 1.16 (*)          | 1.19 (*)          | 1.58 (***)     | 0.97 (n.s.)    | 1.57 (**)      | 1.18 (*)       | 1.06 (n.s.)    | 1.64 (**)      |
|       | 14 vs 20       | 0.63 (***)        | 0.66 (***)        | 0.96 (n.s.)    | 1.12 (n.s.)    | 0.81 (n.s.)    | 1.00 (n.s.)    | 1.20 (n.s.)    | 0.93 (n.s.)    |

**Supplementary Table S6. Fold changes of selected metabolites showing overlap in age regulation among male mice of different strains.** Listed are fold changes in levels of plasma metabolites that were found to be age dependently regulated in three of the four analyzed mouse strains. Fold changes were calculated for the time periods 6 to 10, 10 to 14, and 14 to 20 weeks of age. Changes were tested for significance using Wilcoxon rank sum tests. P-values were corrected for multiple testing using the Benjamini & Hochberg procedure and are given in brackets. \*  $p \leq 0.05$ , \*\*  $p \leq 0.01$ , \*\*\*  $p \leq 0.001$ , n.s. not significant.

|       | Age<br>[weeks] | lysoPC a<br>C20:4 | PC aa<br>C34:2 | PC aa<br>C36:2 | PC aa<br>C36:4 | PC ae<br>C38:1 | PC ae<br>C38:2 | SM<br>C18:1 | SM<br>C24:1 |
|-------|----------------|-------------------|----------------|----------------|----------------|----------------|----------------|-------------|-------------|
| 129S1 | 6 vs 10        | 0.65 (**)         | 1.01 (n.s.)    | 1.04 (n.s.)    | 1.01 (n.s.)    | 1.04 (n.s.)    | 1.49 (**)      | 0.97 (n.s.) | 0.83 (*)    |
|       | 10 vs 14       | 1.07 (n.s.)       | 0.95 (n.s.)    | 0.92 (*)       | 0.84 (**)      | 1.36 (*)       | 1.17 (n.s.)    | 0.76 (**)   | 0.86 (n.s.) |
|       | 14 vs 20       | 0.87 (n.s.)       | 0.94 (n.s.)    | 1.00 (n.s.)    | 1.03 (n.s.)    | 0.99 (n.s.)    | 1.13 (n.s.)    | 1.19 (*)    | 1.09 (n.s.) |
| B6J   | 6 vs 10        | 0.68 (**)         | 1.18 (**)      | 1.25 (**)      | 1.16 (**)      | 1.61 (**)      | 1.50 (**)      | 0.87 (**)   | 0.76 (**)   |
|       | 10 vs 14       | 0.75 (n.s.)       | 0.87 (*)       | 0.90 (*)       | 0.81 (**)      | 1.31 (**)      | 1.27 (**)      | 0.80 (**)   | 1.00 (n.s.) |
|       | 14 vs 20       | 1.25 (n.s.)       | 0.91 (**)      | 0.81 (**)      | 0.99 (n.s.)    | 0.51 (**)      | 0.65 (**)      | 1.11 (n.s.) | 1.10 (n.s.) |
| B6N1a | 6 vs 10        | 0.83 (n.s.)       | 0.93 (n.s.)    | 0.96 (n.s.)    | 0.93 (n.s.)    | 1.88 (**)      | 1.59 (**)      | 0.67 (*)    | 0.74 (*)    |
|       | 10 vs 14       | 1.10 (n.s.)       | 1.18 (*)       | 1.12 (*)       | 1.07 (n.s.)    | 0.98 (n.s.)    | 1.18 (n.s.)    | 0.90 (n.s.) | 1.03 (n.s.) |
|       | 14 vs 20       | 0.68 (**)         | 1.11 (n.s.)    | 1.09 (n.s.)    | 0.98 (n.s.)    | 1.07 (n.s.)    | 1.04 (n.s.)    | 0.89 (n.s.) | 0.75 (**)   |
| C3Fe  | 6 vs 10        | 1.18 (**)         | 1.06 (n.s.)    | 1.12 (n.s.)    | 1.09 (n.s.)    | 0.70 (**)      | 1.06 (n.s.)    | 0.82 (**)   | 0.80 (**)   |
|       | 10 vs 14       | 0.87 (*)          | 1.02 (n.s.)    | 1.04 (n.s.)    | 0.99 (n.s.)    | 1.72 (**)      | 1.26 (**)      | 0.96 (n.s.) | 0.91 (n.s.) |
|       | 14 vs 20       | 0.91 (n.s.)       | 1.22 (**)      | 1.18 (**)      | 1.16 (**)      | 1.29 (*)       | 1.46 (**)      | 0.87 (*)    | 0.81 (**)   |
